# Supplementary figures and images for: Rapid Sampling of Escherichia coli After Changing Oxygen Conditions Reveals Transcriptional Dynamics
Source: MDPI journal article supplement (doi:10.3390/genes8030090), 2017-02-28

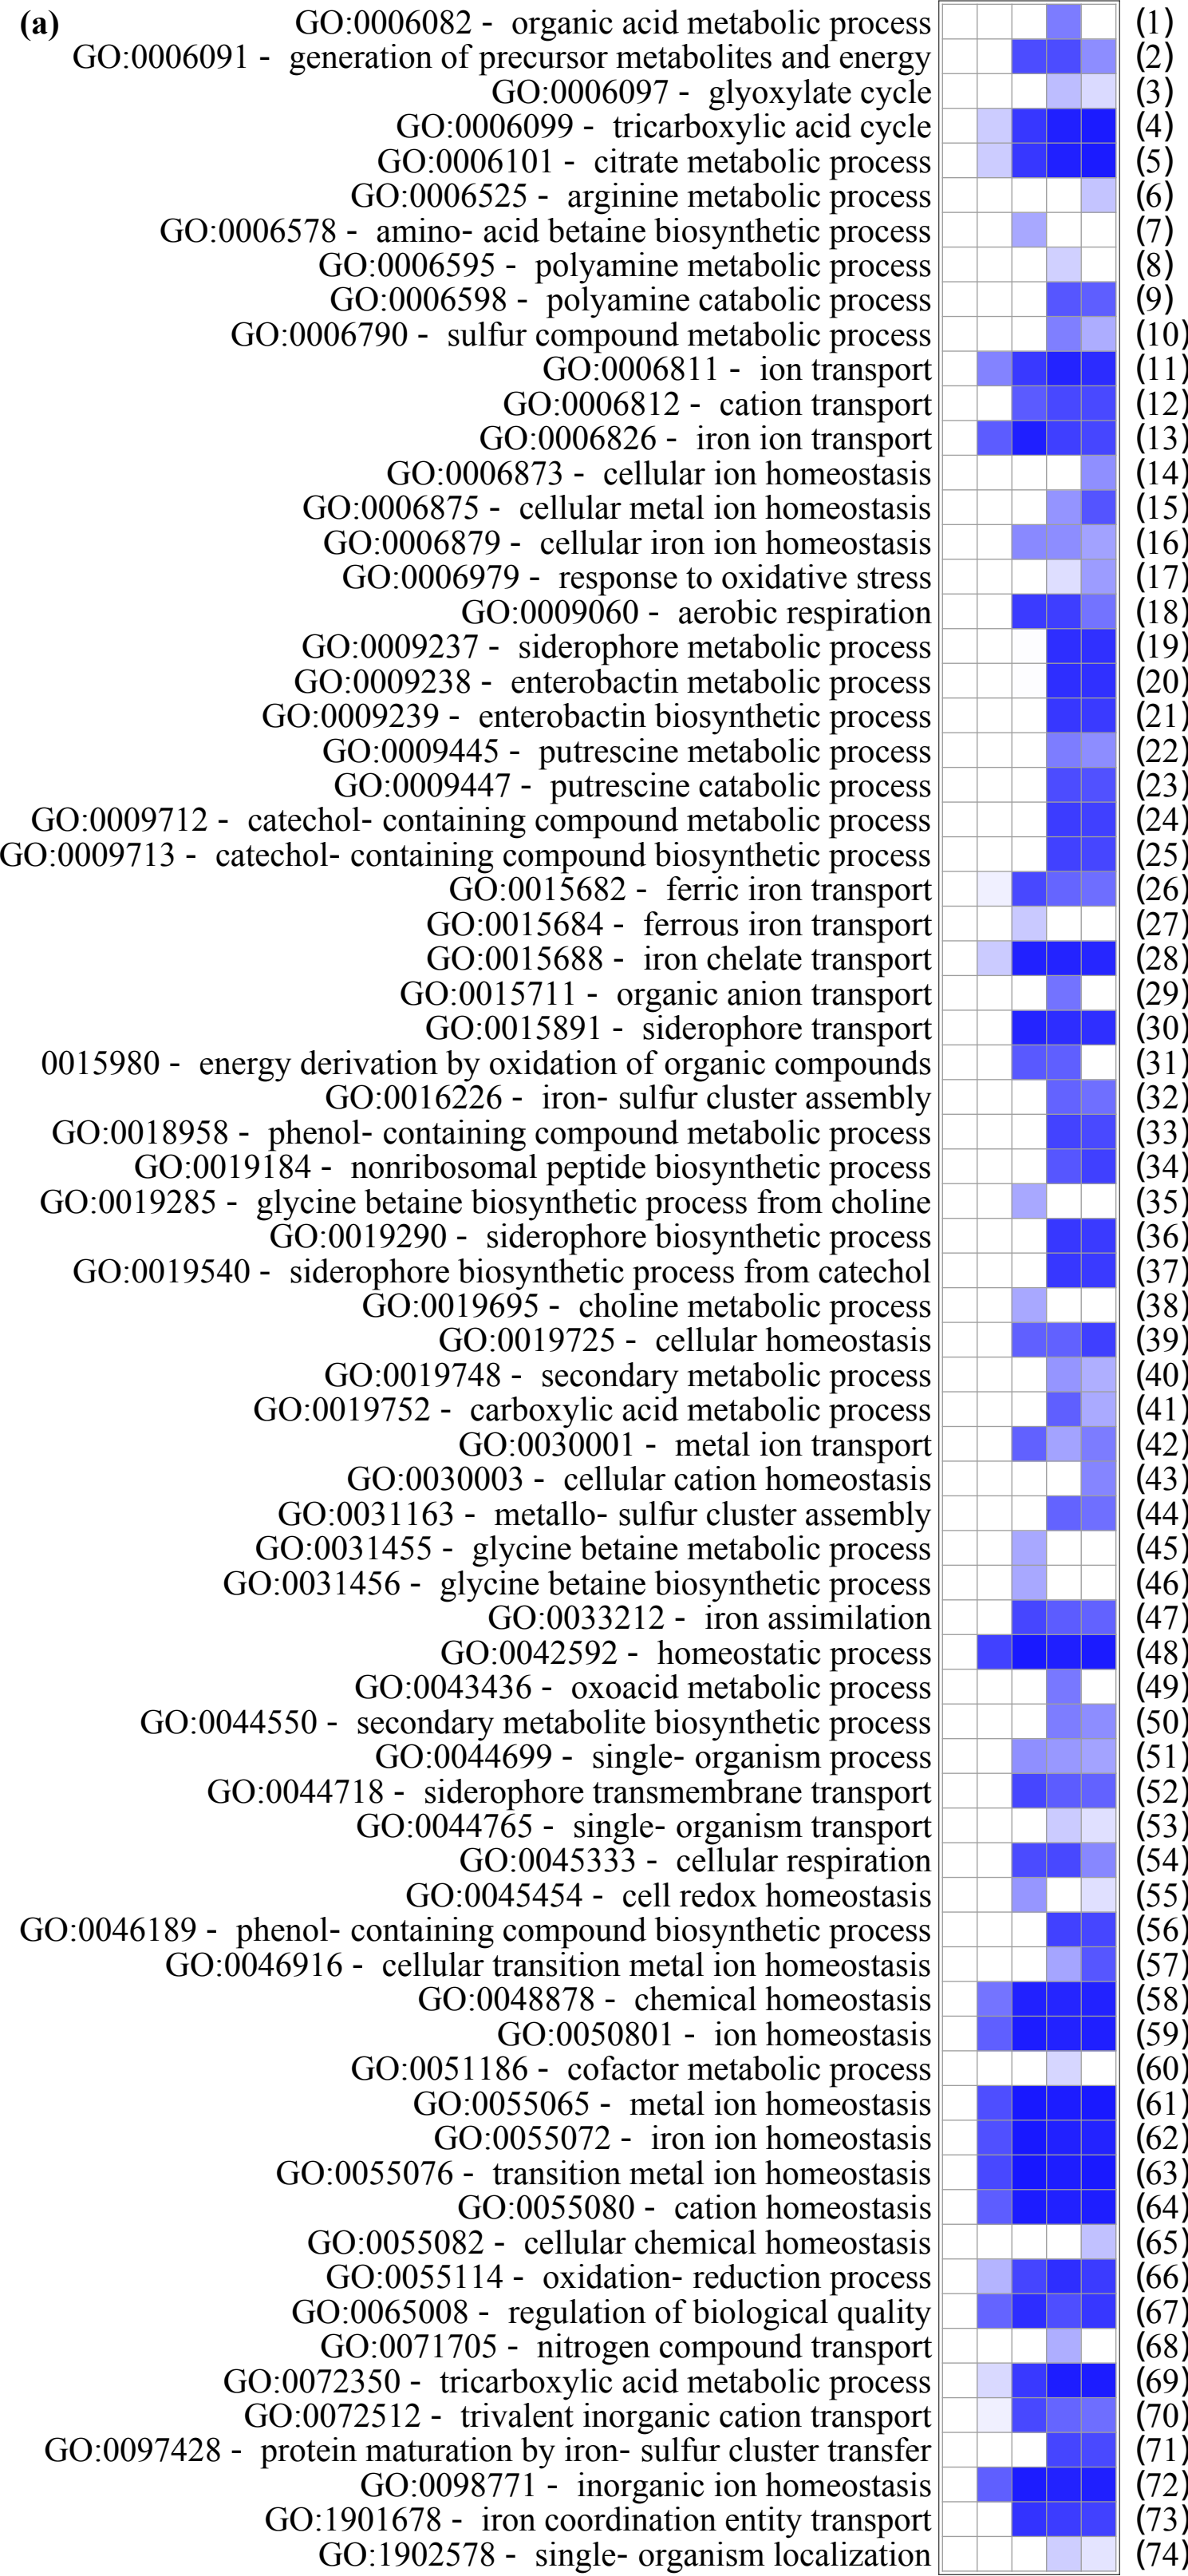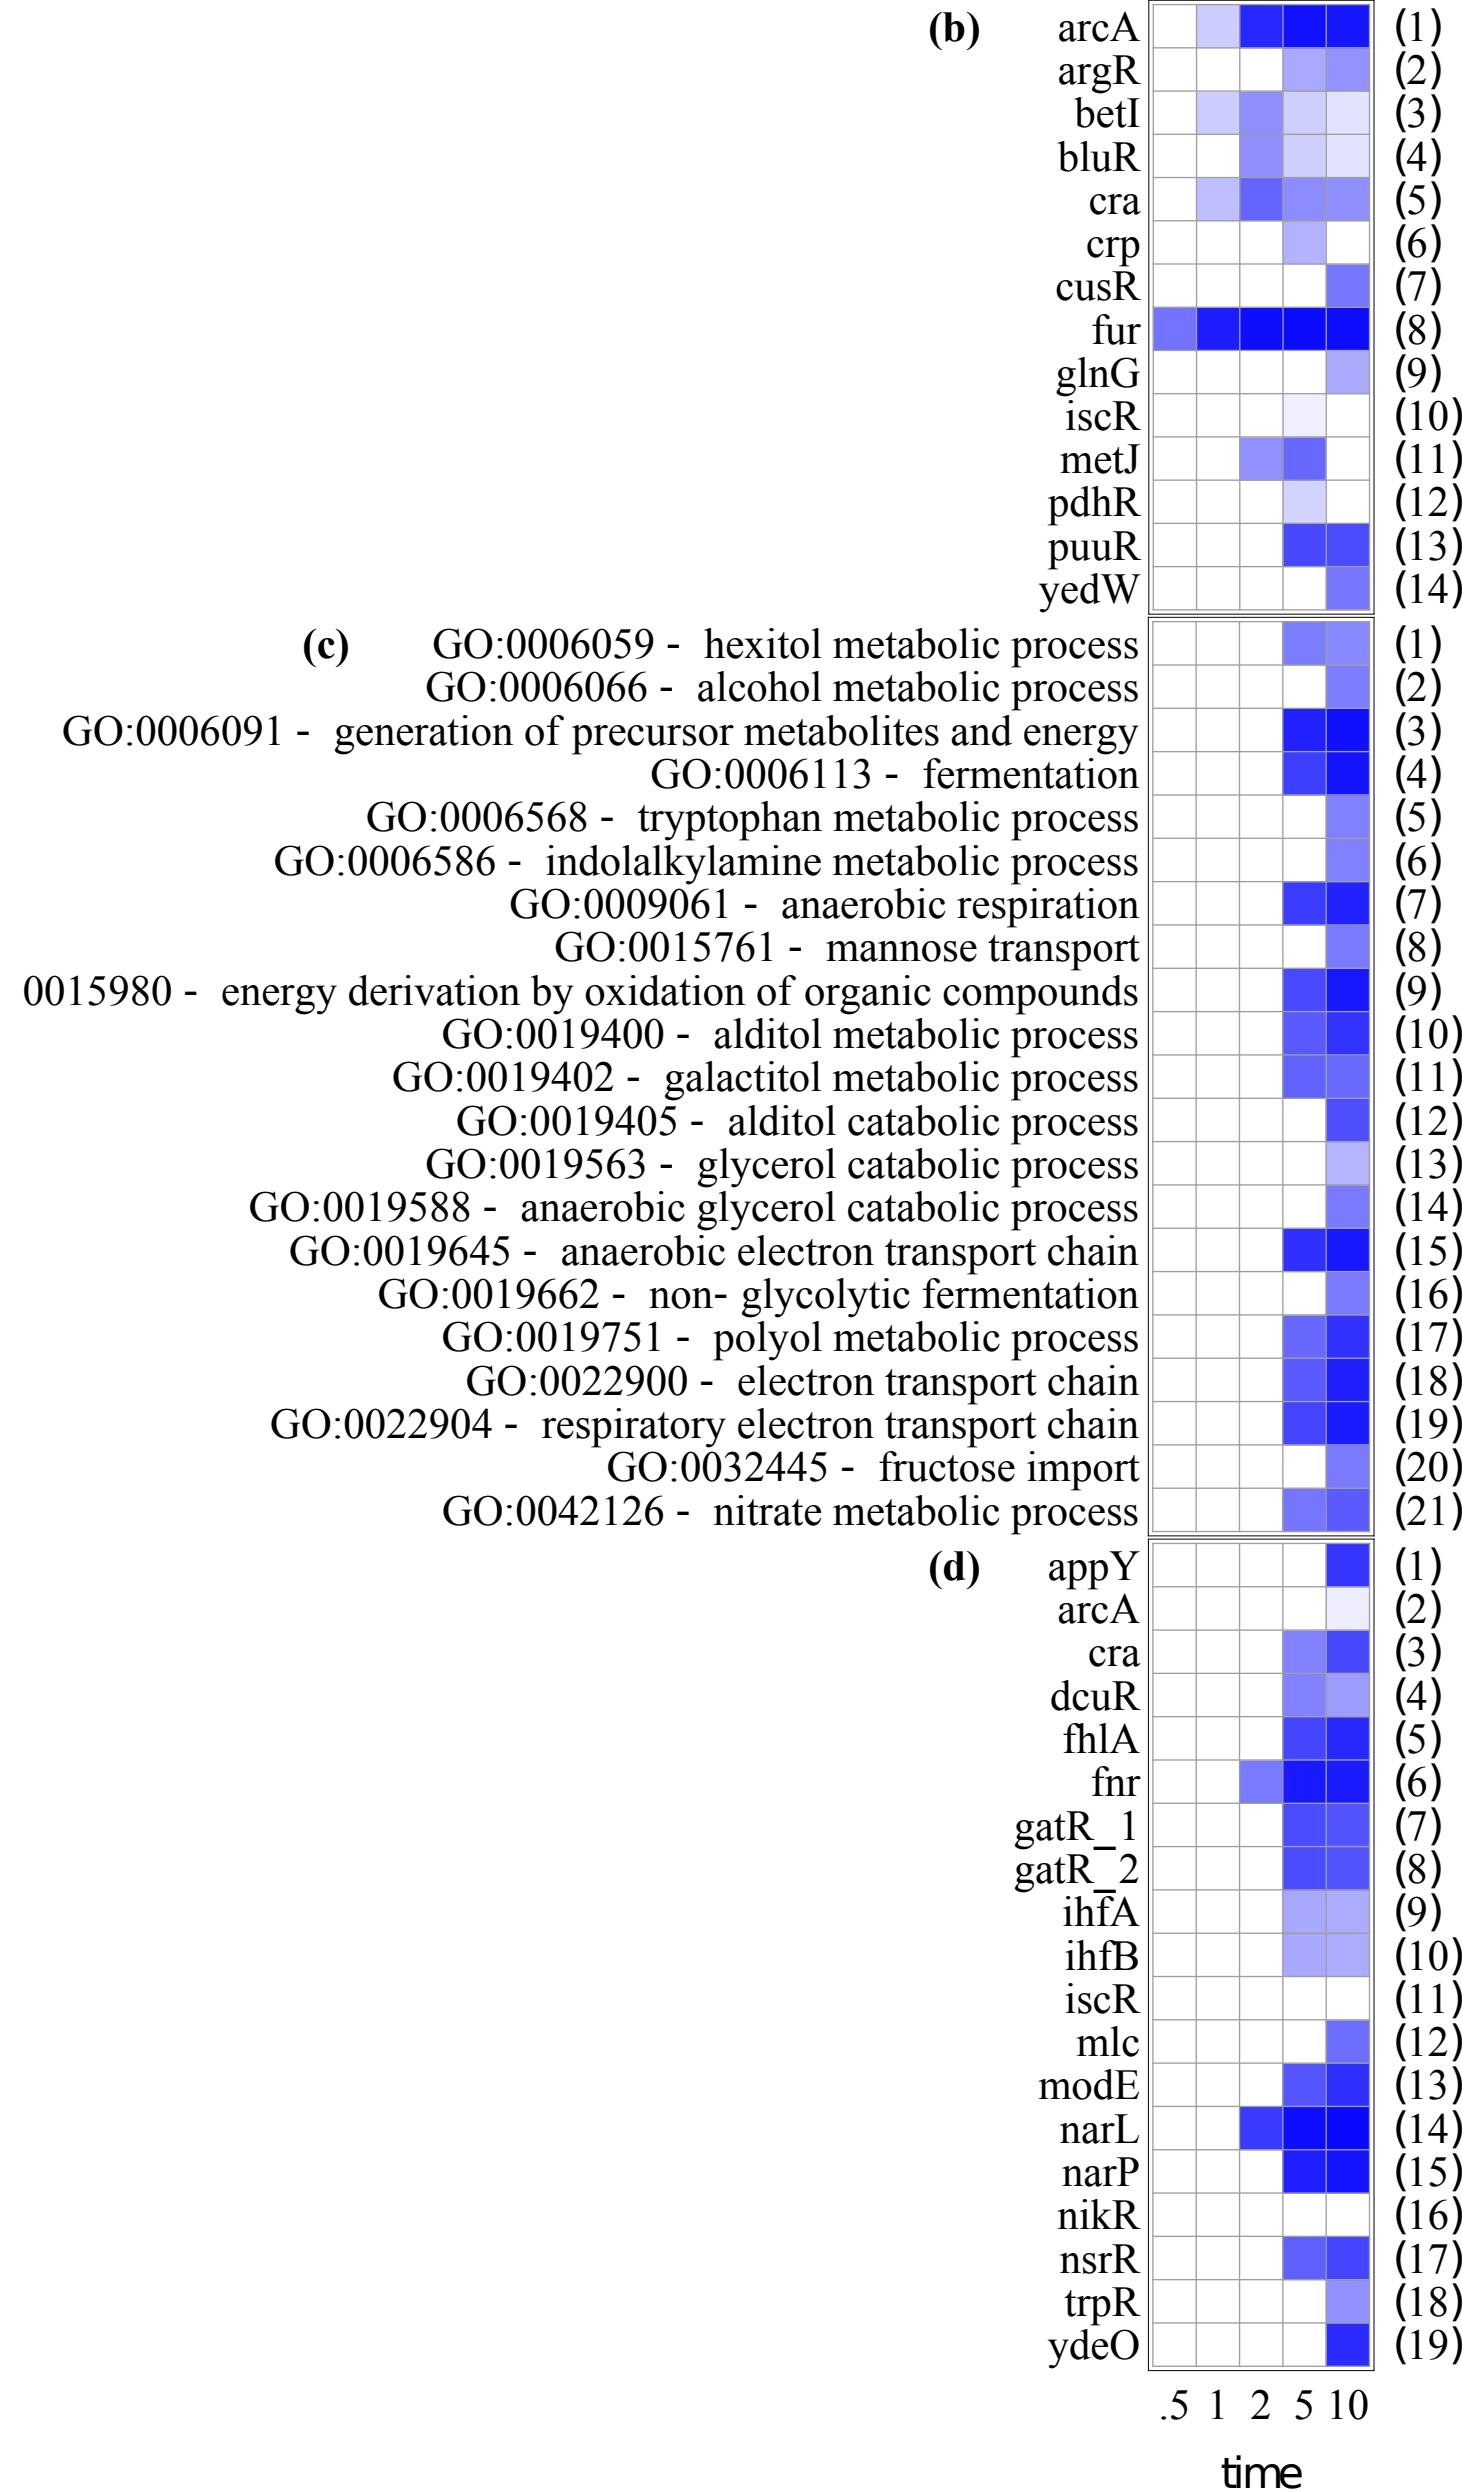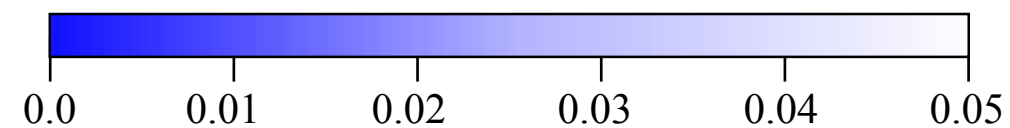

Supplement: s1 [file s1]

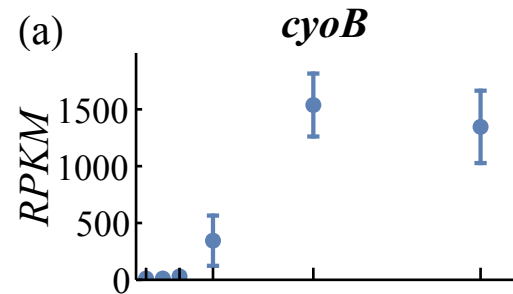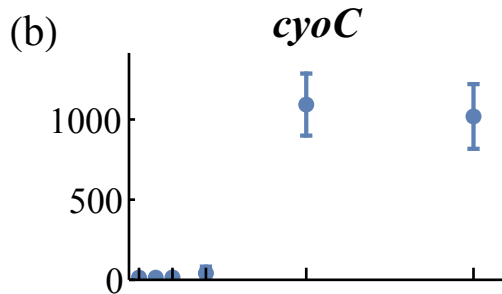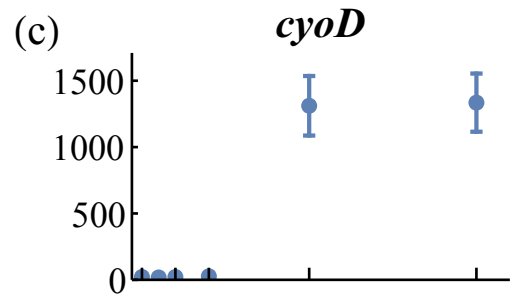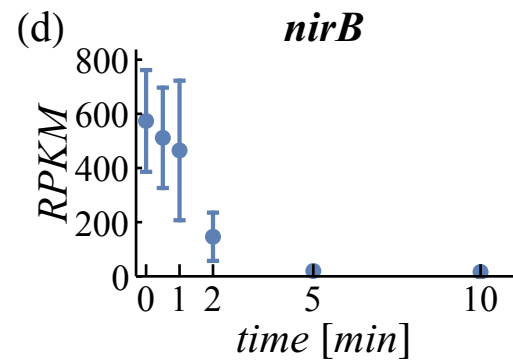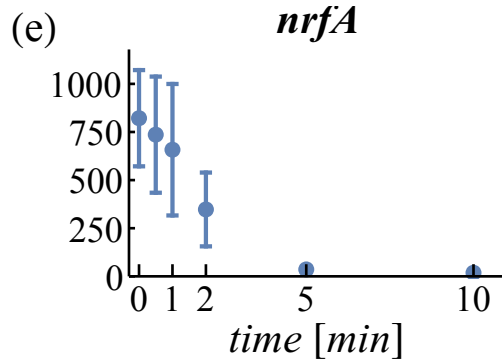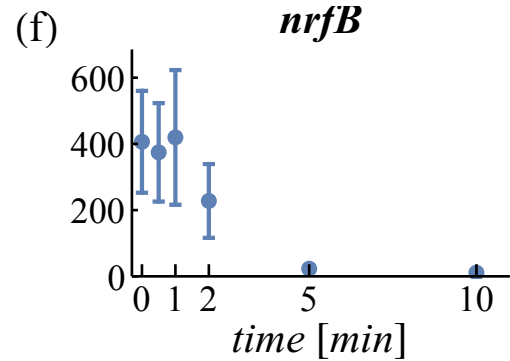

Supplement: s1 [file s1]

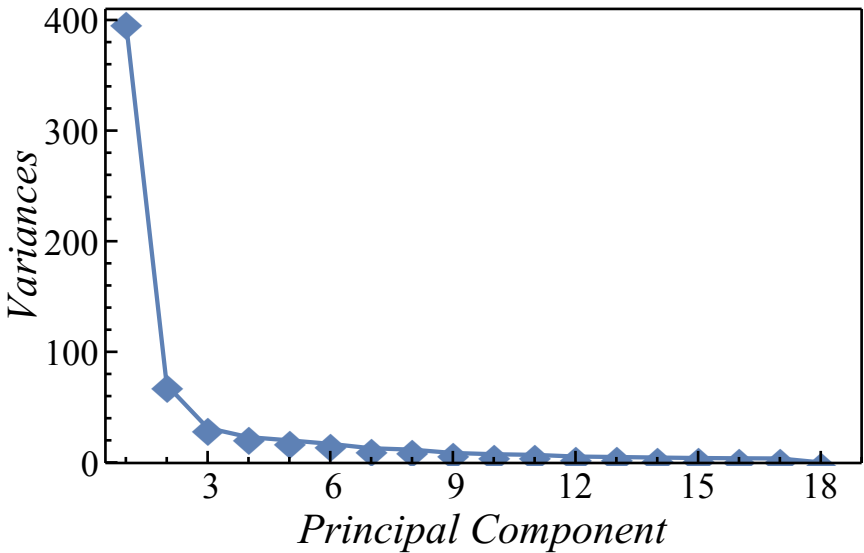

Supplement: s1 [file s1]

(a)

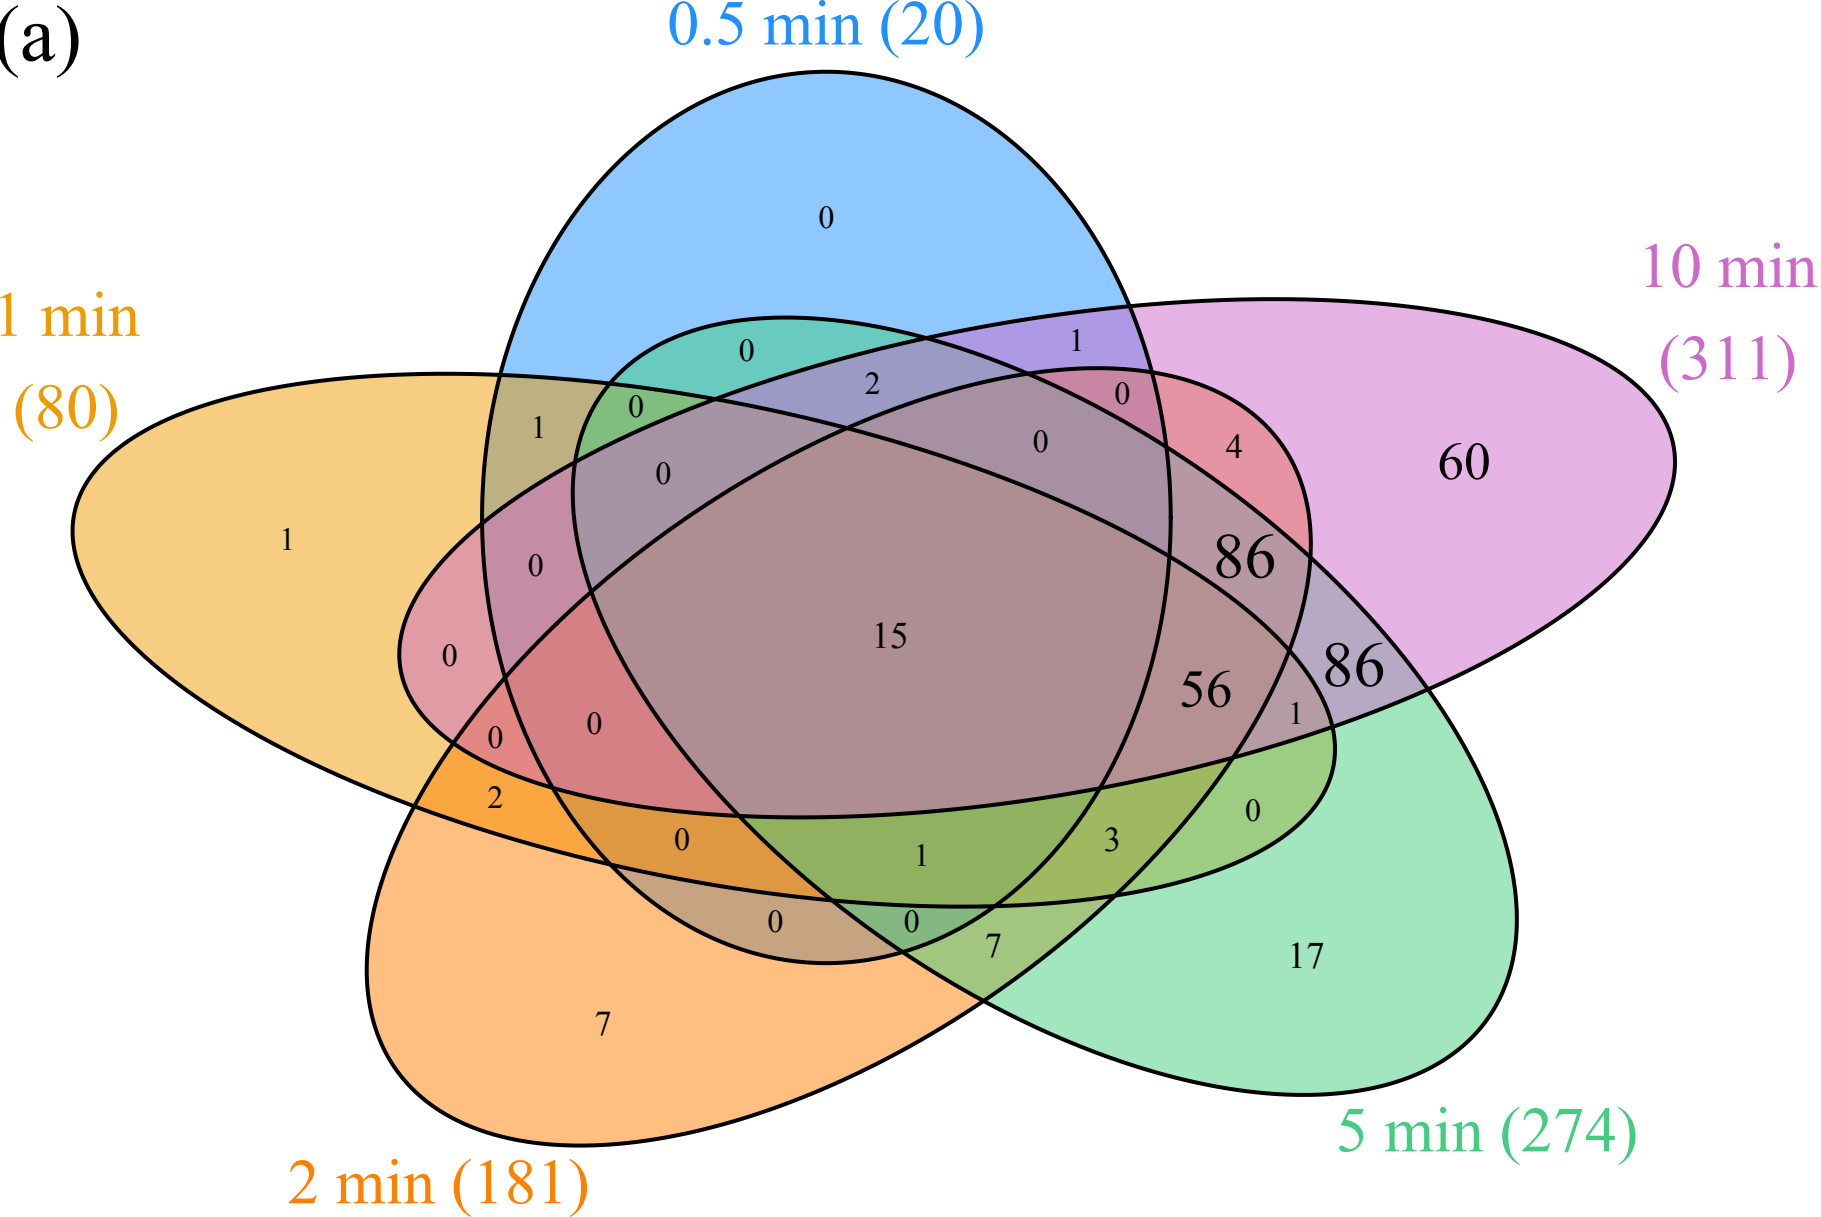

(b)

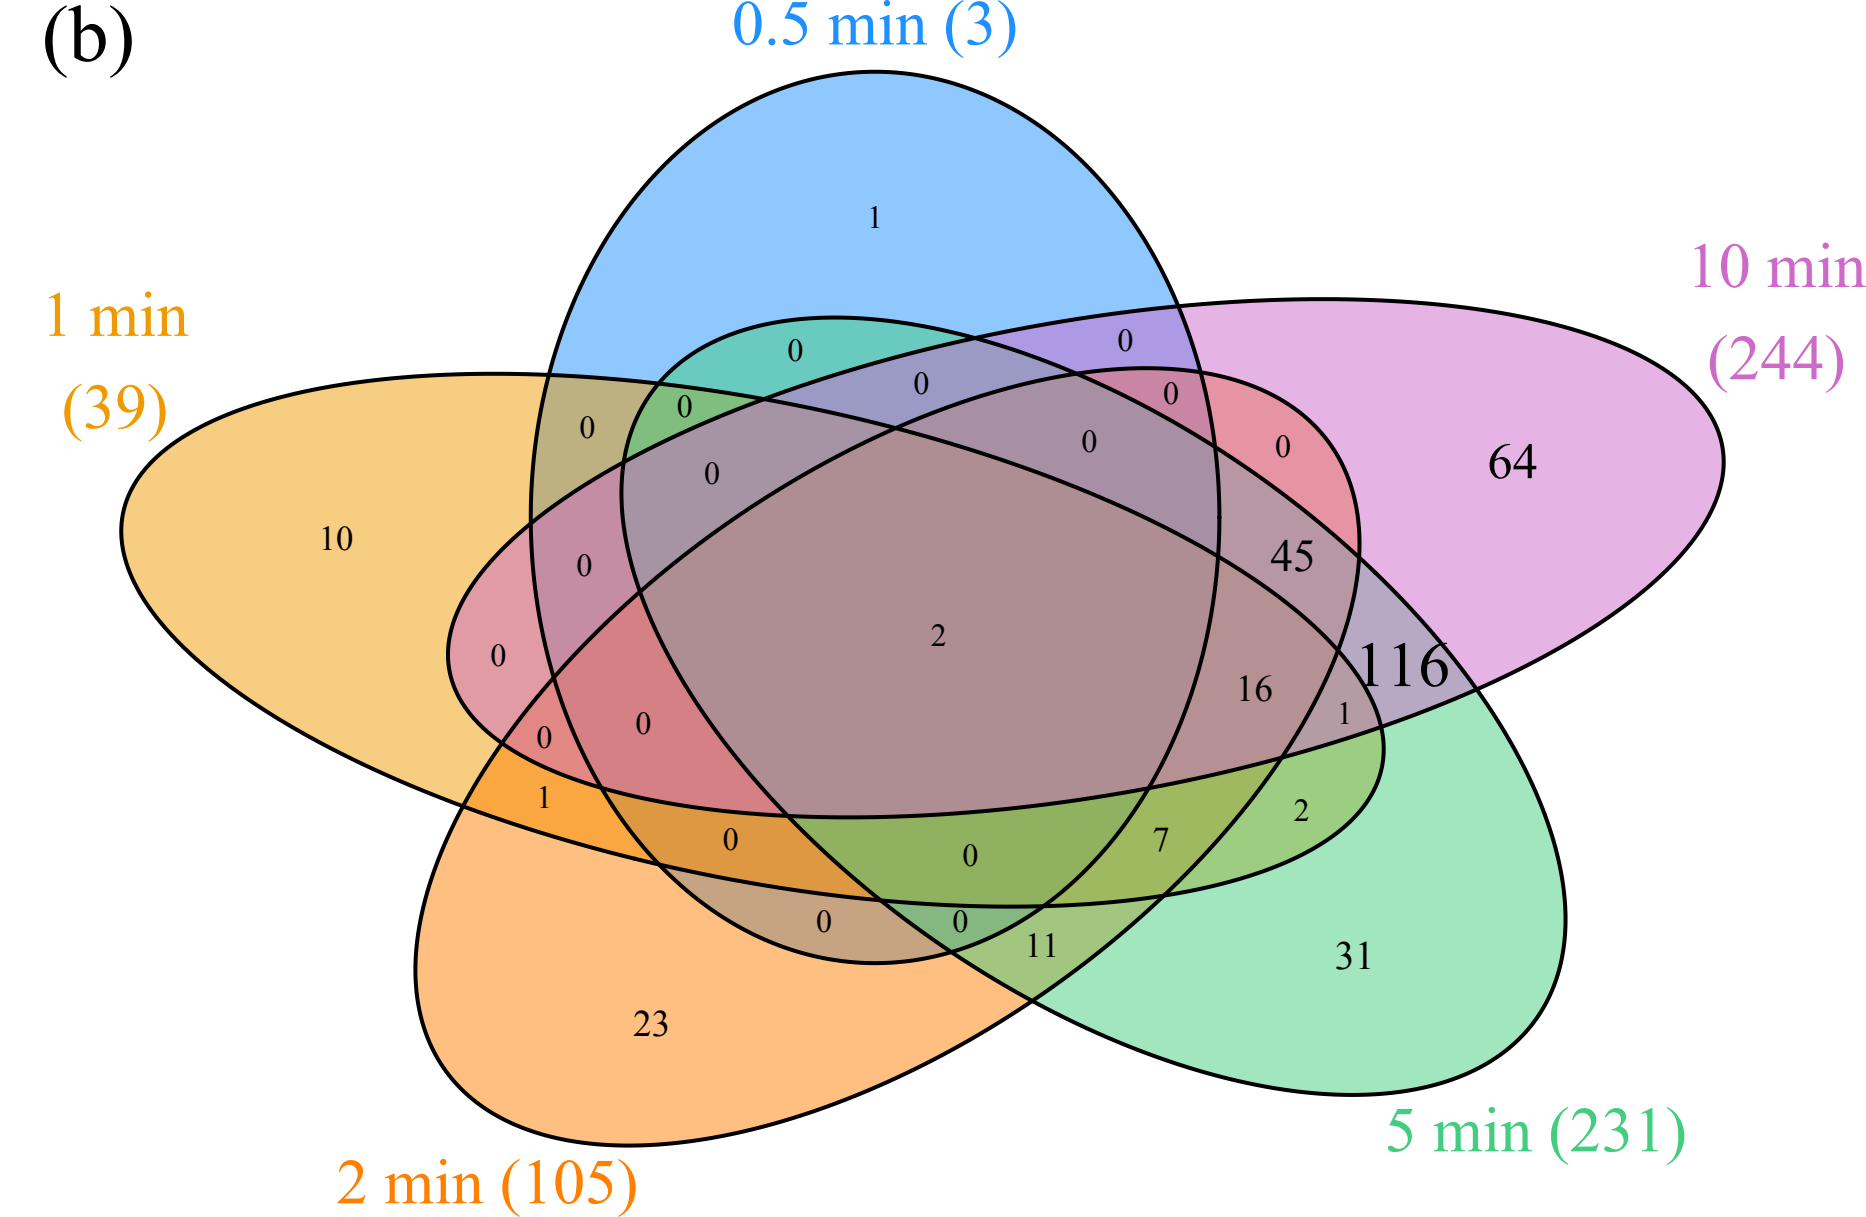

Supplement: s1 [file s1]

0.5

1

2

5

10

min

1

2

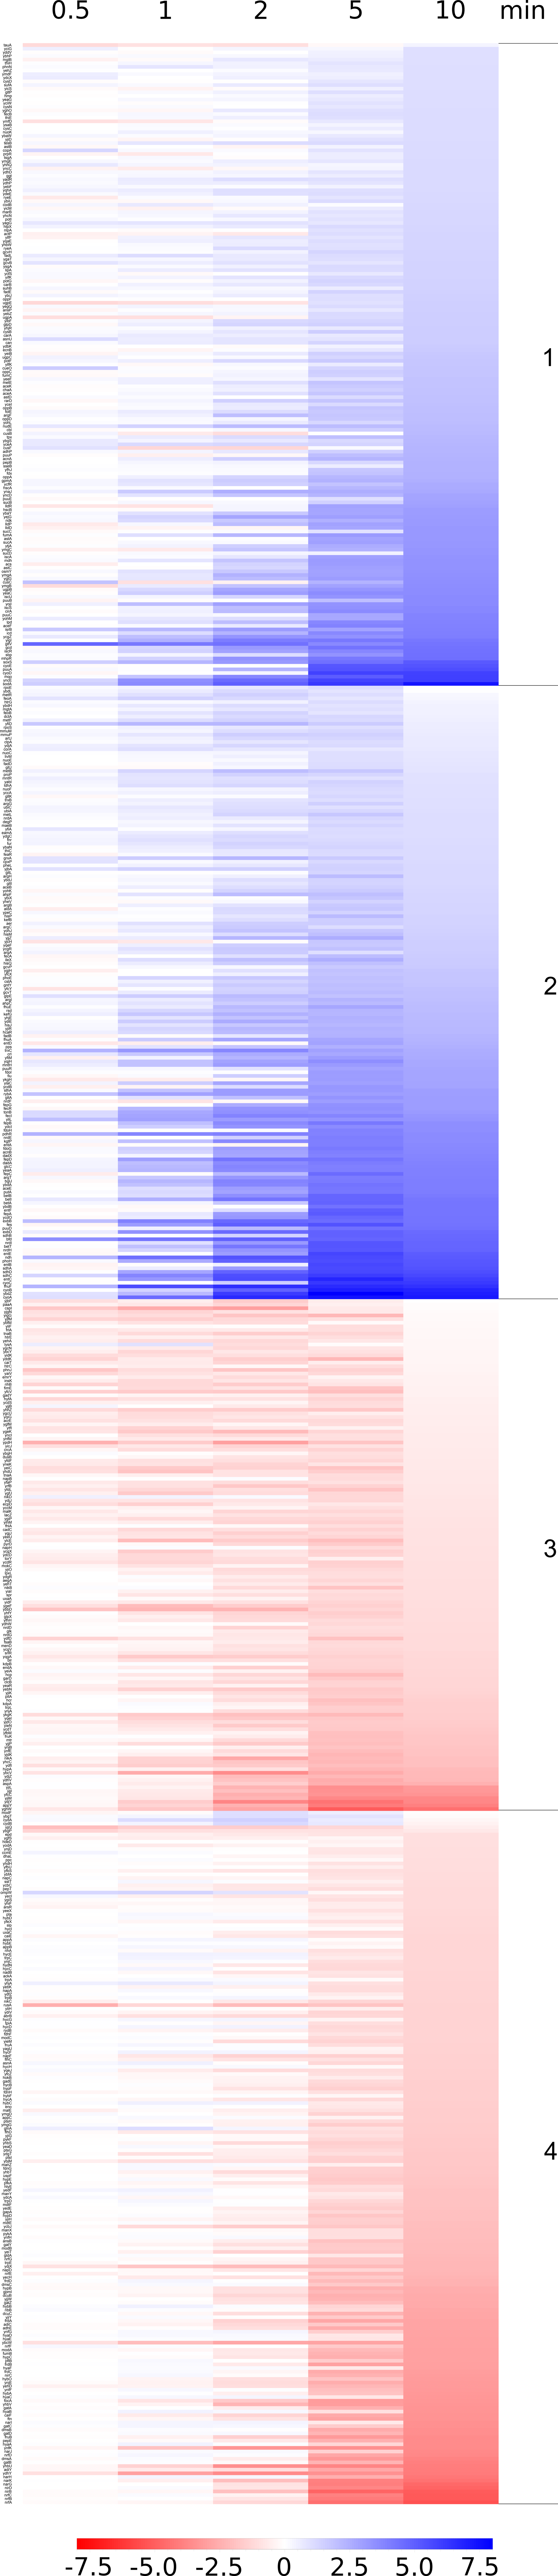

Supplement: s1 [file s1]

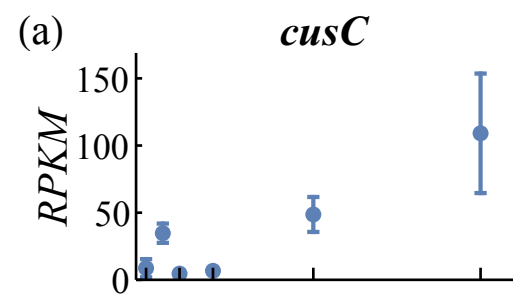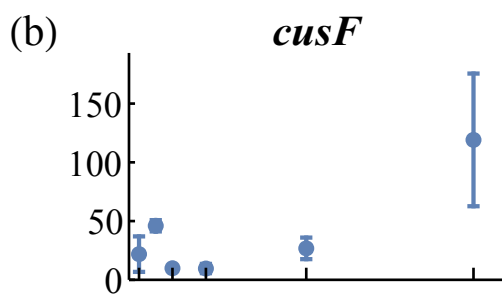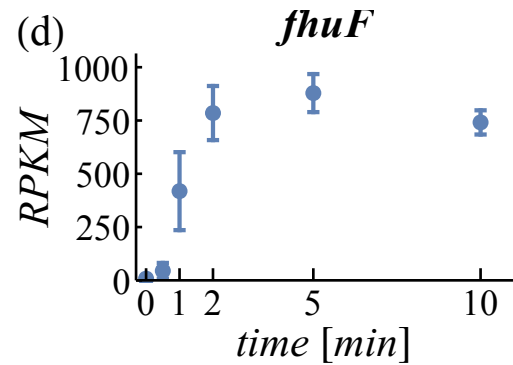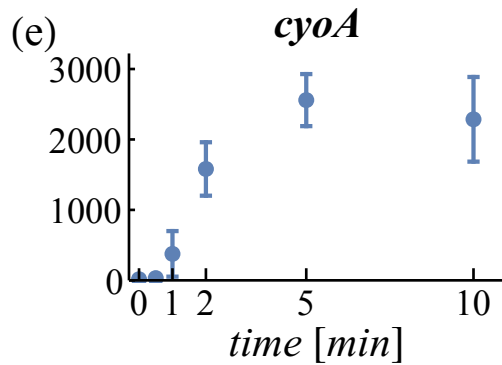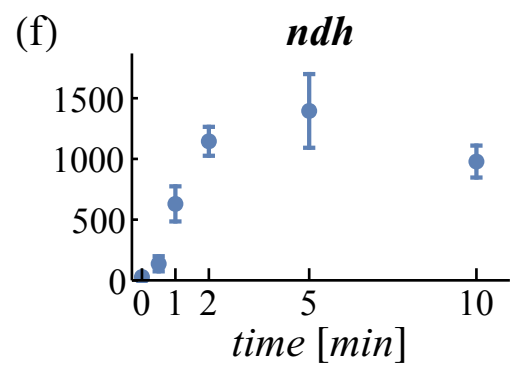

Supplement: s1 [file s1]

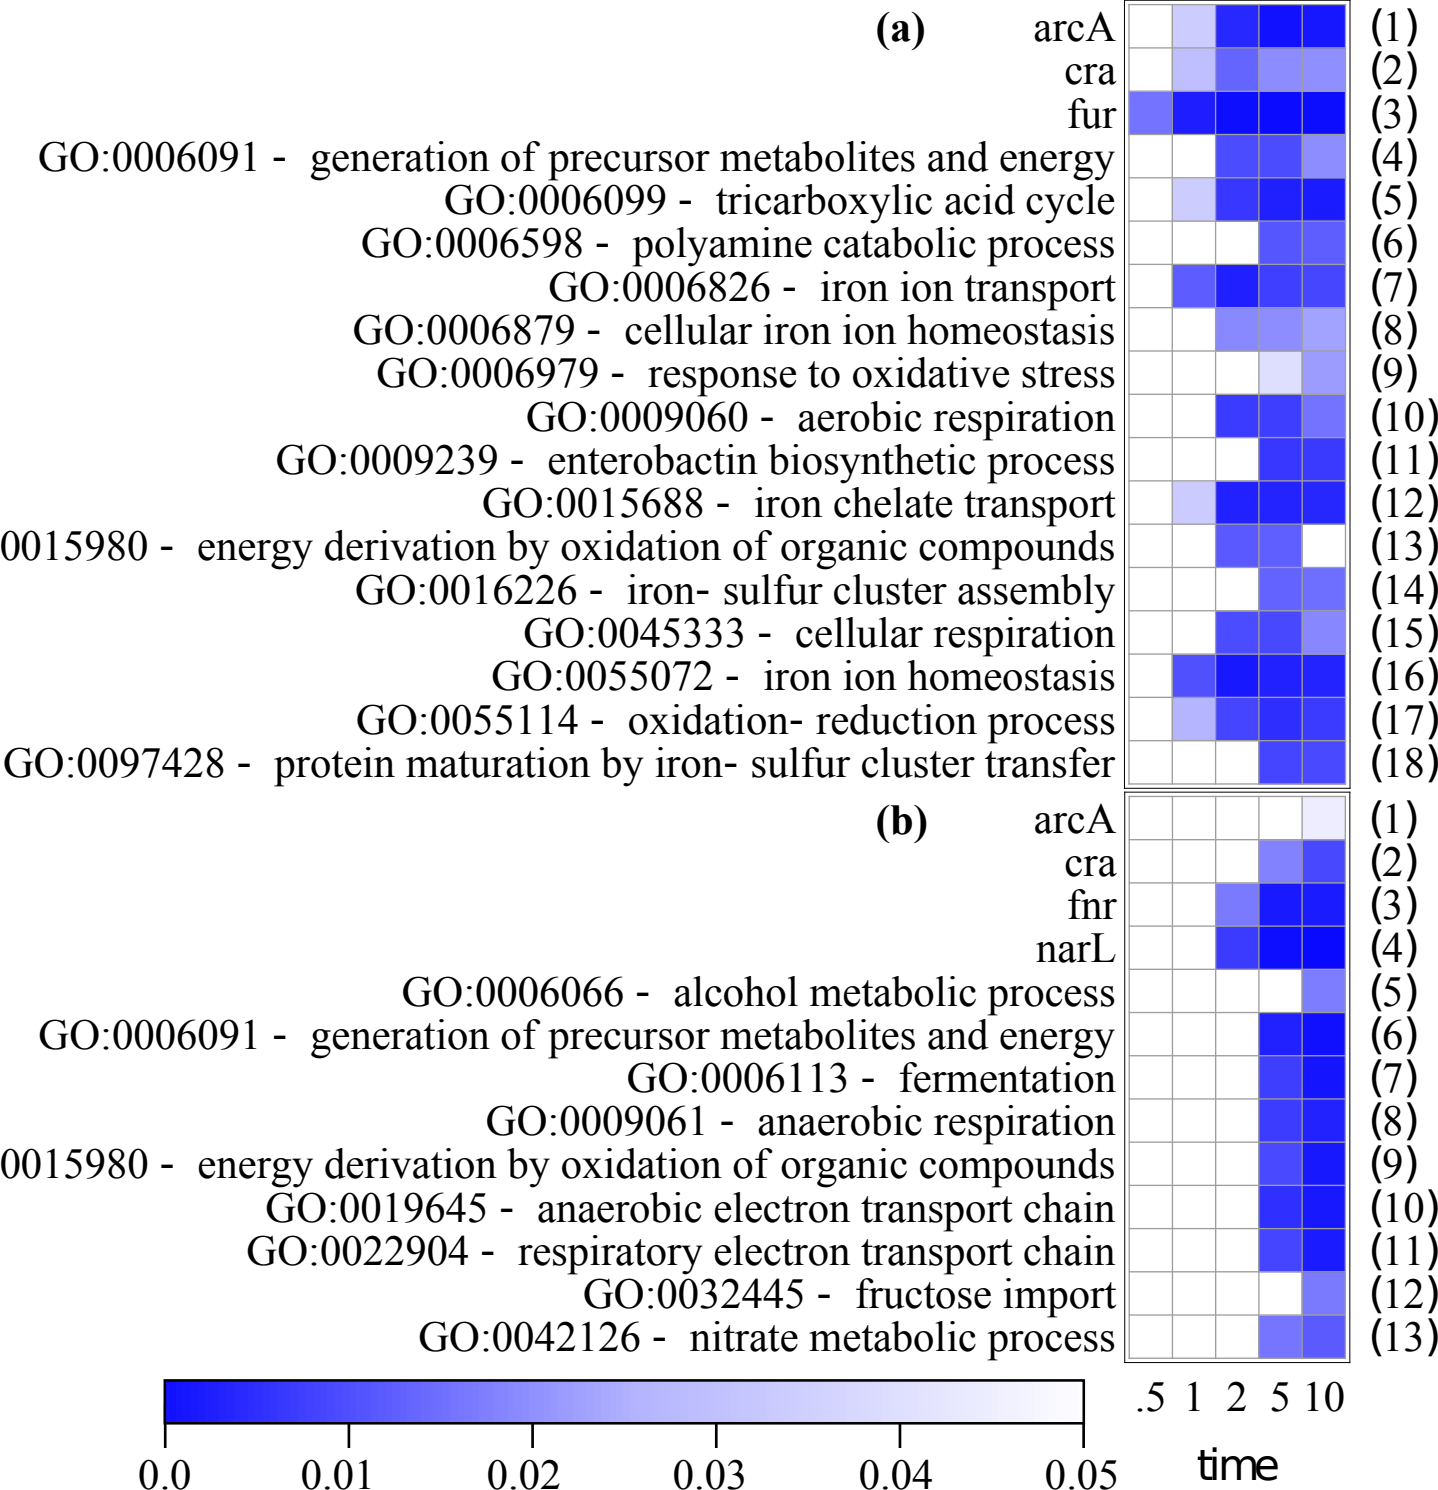

Supplement: s1 [file s1]
